# Supplementary material for: Remarkable enhancement of the electrical conductivity of carbon nanostructured thin films after compression
Source: Royal Society of Chemistry journal article supplement (doi:10.1039/c5nr09025c), 2016-01-01
Supplement: c5nr09025c1.pdf [file c5nr09025c1.pdf]

## Supplementary Information

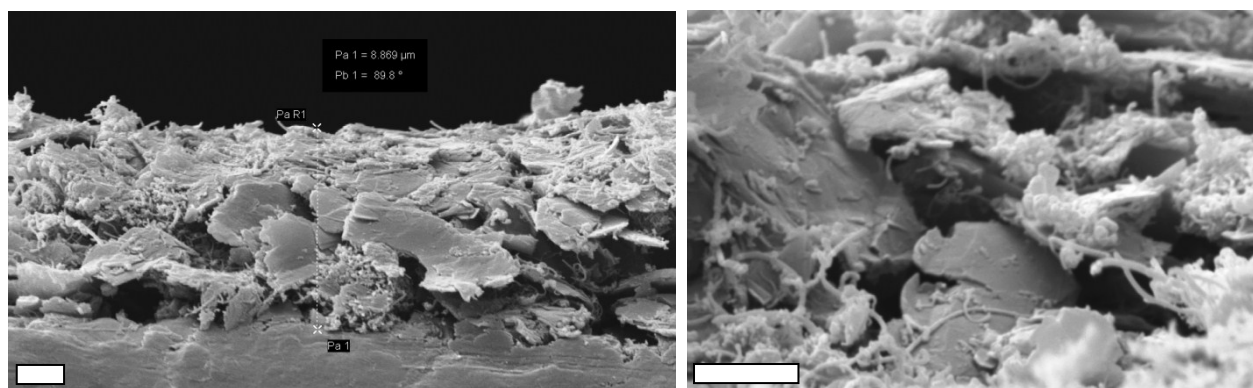

**Fig. S1.** Characteristic SEM images of the hybrid *pG/MWNT-f-OH* thin films from the cross sectional area before compression. The measured mean thickness is about 9 μm. The bars are 2 μm.

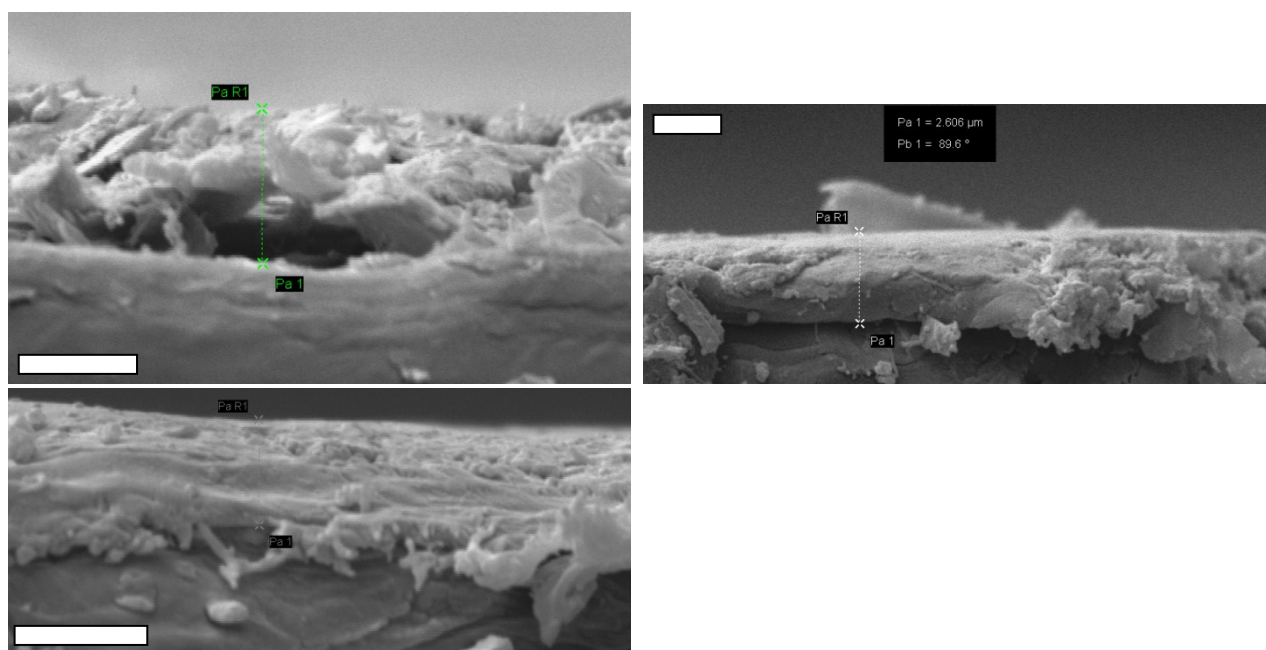

**Fig. S2.** Characteristic SEM images of the hybrid *pG/MWNT-f-OH* thin films from the cross sectional area after compression. The measured mean thickness is about 2.5 μm. The bars are 2 μm.
